# Supplementary material for: Strain energy density function of a near-ideal polymer network estimated by biaxial deformation of Tetra-PEG gel
Source: Royal Society of Chemistry journal article supplement (doi:10.1039/c2sm25340b), 2012-01-01
Supplement: c2sm25340b.pdf [file c2sm25340b.pdf]

## Supplementary information

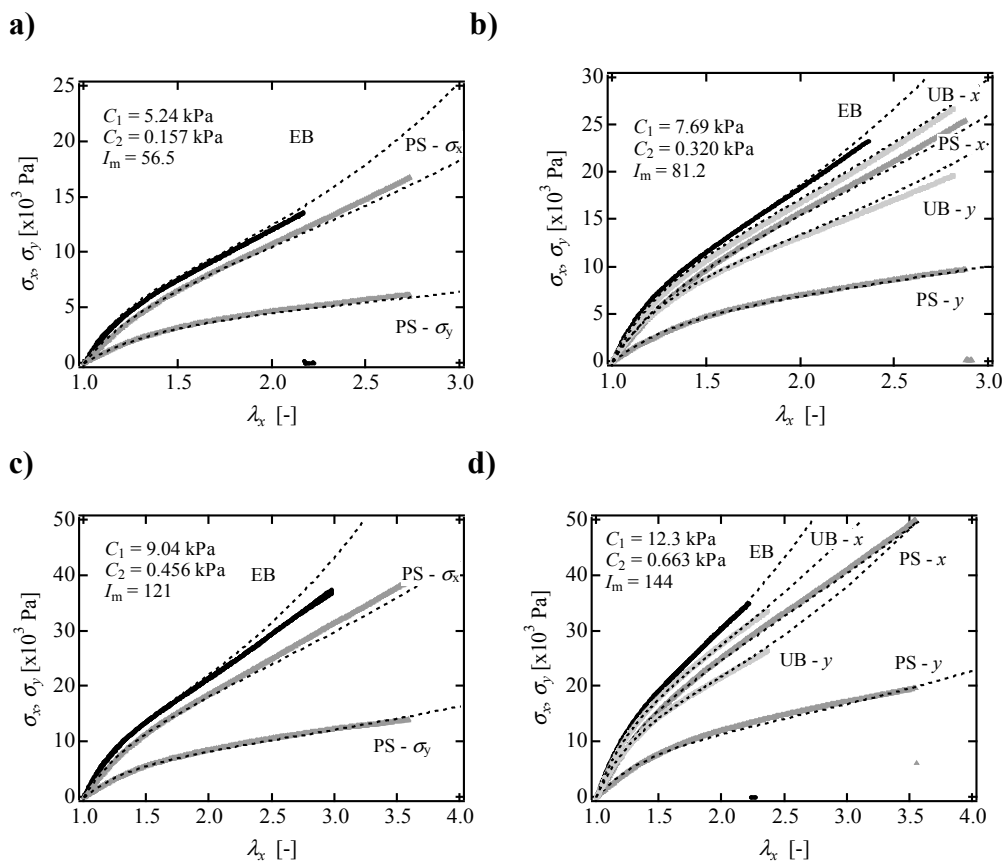

**Supplementary Figure 1. Nominal stress–elongation relationships for Tetra-PEG gel (a:  $\phi_{\square} = 0.0505$ , b:  $\phi_{\square} = 0.0662$ , c:  $\phi_{\square} = 0.0814$ , d:  $\phi_{\square} = 0.0961$ ) under equi-biaxial (EB) stretching, and pure shear (PS). The dashed lines are fitting results of the extended Gent model.**

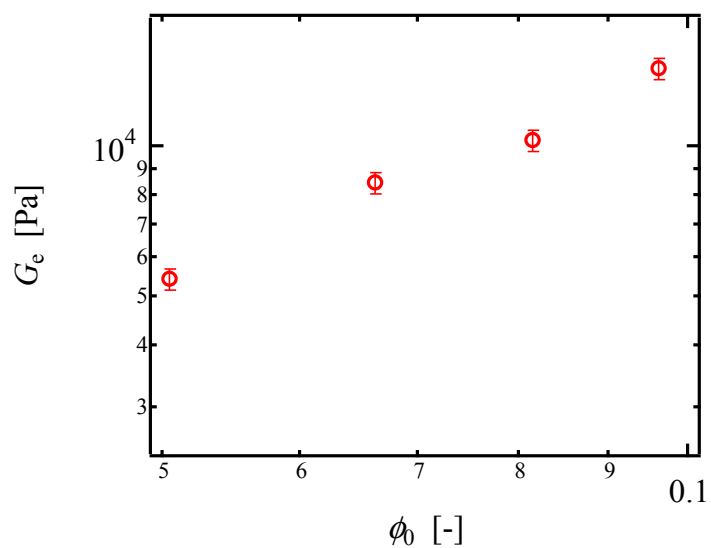

**Supplementary Figure 2.** The equilibrium modulus  $G_e$  as a function of  $\phi_0$ .

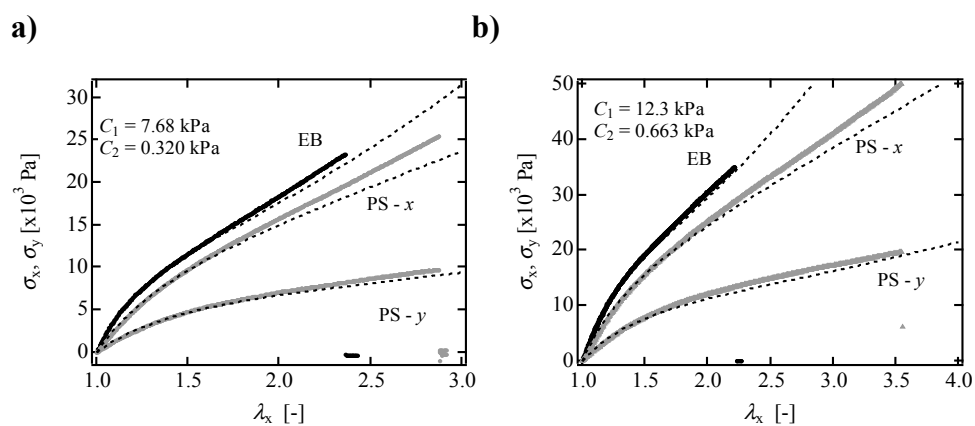

**Supplementary Figure 3.** Nominal stress–elongation relationships for Tetra-PEG gel (a:  $\phi_{\square} = 0.0662$ , b:  $\phi_{\square} = 0.0961$ ) under equi-biaxial (EB) stretching, and pure shear (PS). The dashed lines are fitting results of the Mooney model.
